# Supplementary material
Source: MDPI journal article supplement (https://www.mdpi.com/search?q=remotesensing-09-00681)
Supplement: s001 [file remotesensing-09-00681-s001.pdf]

1 **Supplementary Materials:**2 **Ivan Castillo-Riffart <sup>1</sup>, Mauricio Galleguillos <sup>1,2,\*</sup>, Javier Lopatin <sup>3</sup>, and Jorge Perez-Quezada <sup>1,4</sup>**3 **Table S1. Species cover by peatland.**

| Species/Peatland                                  | Mean |    |    | Minimum |    |    | Maximum |    |    | Standard deviation |    |    |
|---------------------------------------------------|------|----|----|---------|----|----|---------|----|----|--------------------|----|----|
|                                                   | P1   | P2 | P3 | P1      | P2 | P3 | P1      | P2 | P3 | P1                 | P2 | P3 |
| <i>Agrostis capillaris</i> L.                     | 6    | 0  | 2  | 3       | 0  | 5  | 35      | 0  | 15 | 11                 | 0  | 6  |
| <i>Agrostis tenuis</i> L.                         | 2    | 0  | 0  | 3       | 0  | 0  | 15      | 0  | 0  | 5                  | 0  | 0  |
| <i>Aster vahlii</i> (Gaudich.) Hooker et Armott   | 1    | 0  | 0  | 2       | 0  | 0  | 5       | 0  | 0  | 2                  | 0  | 0  |
| <i>Avena</i> sp                                   | 1    | 0  | 0  | 10      | 0  | 0  | 10      | 0  | 0  | 0                  | 0  | 0  |
| <i>Baccharis patagonica</i> Hook. & Arn.          | 20   | 13 | 8  | 3       | 1  | 10 | 75      | 30 | 55 | 23                 | 9  | 19 |
| <i>Baccharis sagittalis</i> (Less.) DC.           | 0    | 0  | 0  | 1       | 0  | 0  | 1       | 0  | 0  | 0                  | 0  | 0  |
| <i>Berberis microphylla</i> G. Forst.             | 5    | 0  | 0  | 35      | 1  | 0  | 35      | 1  | 0  | 0                  | 0  | 0  |
| <i>Blechnum chilensis</i>                         | 2    | 0  | 2  | 2       | 0  | 1  | 30      | 0  | 10 | 14                 | 0  | 3  |
| <i>Blechnum cordatum</i> (Desv.) Hieron.          | 0    | 5  | 0  | 0       | 1  | 0  | 0       | 50 | 0  | 0                  | 17 | 0  |
| <i>Blechnum magellanicum</i> (Desv.) Mett.        | 0    | 0  | 0  | 0       | 5  | 0  | 0       | 5  | 0  | 0                  | 0  | 0  |
| <i>Blechnum penna-marina</i> (Poir.) Kuhn         | 19   | 1  | 1  | 3       | 1  | 1  | 50      | 1  | 5  | 15                 | 0  | 2  |
| <i>Carex distenta</i> Kunze ex Kuhn               | 9    | 0  | 0  | 10      | 0  | 0  | 60      | 0  | 0  | 19                 | 0  | 0  |
| <i>Carex eamatorrhyncha</i> É. Desv.              | 6    | 0  | 0  | 2       | 0  | 0  | 40      | 0  | 0  | 12                 | 0  | 0  |
| <i>Carex magellanica</i> Lam.                     | 1    | 0  | 2  | 3       | 1  | 1  | 5       | 5  | 5  | 1                  | 2  | 2  |
| <i>Centella asiatica</i> (L.) Urb.                | 12   | 0  | 0  | 1       | 1  | 0  | 50      | 1  | 0  | 18                 | 0  | 0  |
| <i>Danthonia chilensis</i> E. Desv.               | 2    | 0  | 0  | 5       | 0  | 5  | 20      | 0  | 5  | 11                 | 0  | 0  |
| <i>Eleocharis pachycarpa</i> É. Dsv.              | 1    | 0  | 1  | 5       | 0  | 2  | 5       | 0  | 10 | 0                  | 0  | 6  |
| <i>Empetrum rubrum</i> Vahl ex Willd.             | 2    | 0  | 15 | 30      | 0  | 5  | 30      | 0  | 40 | 0                  | 0  | 11 |
| <i>Gaultheria insana</i> (Molina) D.J. Middleton  | 0    | 0  | 0  | 0       | 1  | 0  | 0       | 1  | 0  | 0                  | 0  | 0  |
| <i>Gaultheria mucronata</i> (L. f.) Hook. & Arn.  | 18   | 7  | 11 | 5       | 1  | 2  | 35      | 25 | 20 | 9                  | 8  | 6  |
| <i>Holcus lanatus</i> L.                          | 0    | 0  | 0  | 1       | 0  | 0  | 2       | 0  | 0  | 1                  | 0  | 0  |
| <i>Hypochaeris radicata</i> L.                    | 1    | 0  | 0  | 1       | 0  | 0  | 10      | 0  | 0  | 4                  | 0  | 0  |
| <i>Juncus planifolius</i> R. Br.                  | 4    | 1  | 1  | 10      | 15 | 1  | 20      | 15 | 5  | 4                  | 0  | 2  |
| <i>Juncus procerus</i> E. Mey.                    | 2    | 8  | 2  | 5       | 10 | 1  | 10      | 60 | 15 | 3                  | 22 | 6  |
| <i>Juncus stipulatus</i> Nees & Meyen             | 0    | 2  | 0  | 0       | 1  | 0  | 0       | 20 | 0  | 0                  | 10 | 0  |
| <i>Lotus pedunculatus</i> Cav.                    | 0    | 0  | 0  | 3       | 0  | 0  | 3       | 0  | 0  | 0                  | 0  | 0  |
| <i>Luma apiculata</i> (DC.) Burret                | 0    | 0  | 0  | 0       | 1  | 0  | 0       | 1  | 0  | 0                  | 0  | 0  |
| <i>Myrteola nummularia</i> (Poir.) O. Berg        | 15   | 4  | 22 | 2       | 1  | 5  | 35      | 20 | 40 | 10                 | 6  | 10 |
| <i>Nothofagus nitida</i> (Phil.) Krasser          | 0    | 0  | 0  | 0       | 1  | 0  | 0       | 1  | 0  | 0                  | 0  | 0  |
| <i>Oreobolus obtusangulus</i> Gaudich             | 0    | 0  | 1  | 0       | 0  | 1  | 0       | 0  | 15 | 0                  | 0  | 7  |
| <i>Ovidia pillo-pillo</i> (Gay) meism.            | 0    | 0  | 1  | 0       | 0  | 18 | 0       | 0  | 18 | 0                  | 0  | 0  |
| <i>Philesia magellanica</i> J.F. Gmel.            | 0    | 0  | 19 | 0       | 1  | 5  | 0       | 1  | 60 | 0                  | 0  | 15 |
| <i>Pilgerodendron uviferum</i> (D. Don) Florin.   | 0    | 0  | 11 | 0       | 0  | 5  | 0       | 0  | 40 | 0                  | 0  | 12 |
| <i>Poaceae</i> sp. 1                              | 0    | 0  | 0  | 5       | 0  | 0  | 5       | 0  | 0  | 0                  | 0  | 0  |
| <i>Polypogon linearis</i> Trin.                   | 1    | 0  | 1  | 2       | 0  | 2  | 4       | 0  | 3  | 1                  | 0  | 1  |
| <i>Schizaea fiotulosa</i> Labill                  | 0    | 0  | 0  | 0       | 0  | 2  | 0       | 0  | 2  | 0                  | 0  | 0  |
| <i>Schoenus rhynchosporoides</i> (Steud.) Kük.    | 1    | 4  | 6  | 20      | 1  | 2  | 20      | 45 | 25 | 0                  | 20 | 8  |
| <i>Sticherus cryptocarpus</i> (Hook.) Ching       | 12   | 43 | 18 | 10      | 10 | 1  | 35      | 90 | 70 | 9                  | 25 | 19 |
| <i>Tepualia stipularis</i> (Hook. & Arn.) Griseb. | 0    | 0  | 0  | 0       | 1  | 0  | 0       | 1  | 0  | 0                  | 0  | 0  |
| <i>Trifolium repens</i> L.                        | 0    | 0  | 0  | 2       | 0  | 0  | 2       | 0  | 0  | 0                  | 0  | 0  |

|                                       |   |   |   |   |   |   |    |    |   |    |    |   |
|---------------------------------------|---|---|---|---|---|---|----|----|---|----|----|---|
| <i>Uncinia sp.</i>                    | 0 | 0 | 0 | 0 | 5 | 0 | 0  | 5  | 0 | 0  | 0  | 0 |
| <i>Uncinia tenuis Poepp. ex Kunth</i> | 4 | 1 | 0 | 1 | 1 | 0 | 20 | 20 | 0 | 10 | 11 | 0 |

4 **Table S2.** Spectral resolution of sensors. The sensor bands are divided by spectral range, where NIR  
5 is near infrared and SWIR is short wave infrared.

| Sensor | Bands  |       | Central<br>wavelength (nm) | Bandwidth<br>(nm) | Spatial<br>resolution (m) |
|--------|--------|-------|----------------------------|-------------------|---------------------------|
| OLI    | Blue   | B2    | 482                        | 60                | 30                        |
|        | Green  | B3    | 561                        | 57                | 30                        |
|        | Red    | B4    | 655                        | 37                | 30                        |
|        | NIR    | B5    | 865                        | 28                | 30                        |
|        | SWIR 1 | B6    | 1609                       | 85                | 30                        |
|        | SWIR 2 | B7    | 2200                       | 187               | 30                        |
|        | ASTER  | Green | B1                         | 560               | 80                        |
| Red    |        | B2    | 660                        | 60                | 15                        |
| NIR    |        | B3N   | 810                        | 100               | 15                        |
| MSI    | Blue   | B2    | 490                        | 64                | 10                        |
|        | Green  | B3    | 560                        | 36                | 10                        |
|        | Red    | B4    | 665                        | 30                | 10                        |
|        | NIR    | B8    | 842                        | 115               | 10                        |
|        | NIR    | B5    | 705                        | 15                | 20                        |
|        | NIR    | B6    | 740                        | 15                | 20                        |
|        | NIR    | B7    | 783                        | 20                | 20                        |
|        | NIR    | B8a   | 865                        | 20                | 20                        |
|        | SWIR 1 | B11   | 1610                       | 90                | 20                        |
|        | SWIR 2 | B12   | 2190                       | 180               | 20                        |

6

7
